# Supplementary material for: Artificially induced normal ferroelectric behaviour in aerosol deposited relaxor 65PMN–35PT thick films by interface engineering
Source: Royal Society of Chemistry journal article supplement (doi:10.1039/d0tc05644h), 2021-01-01
Supplement: d0tc05644h1.pdf [file d0tc05644h1.pdf]

## Electronic supplementary information (ESI)

**Title:** Artificially induced normal ferroelectric behaviour in aerosol deposited relaxor 65PMN-35PT thick films by interface engineering

**Journal:** Journal of Materials Chemistry C

**Authors:** Atul Thakre<sup>a,#</sup>, Ajeet Kumar<sup>a,#</sup>, Min-Young Lee<sup>a</sup>, Deepak Rajaram Patil<sup>a</sup>, Soohyun Kim<sup>a,b\*</sup>, Jungho Ryu<sup>a,b\*</sup>

<sup>a</sup>*School of Materials Science and Engineering, Yeungnam University, Gyeongsan, Gyeongbuk 38541, South Korea*

<sup>b</sup>*Institute of Materials Technology, Yeungnam University, Gyeongsan 38541, South Korea*

\*Corresponding authors e-mails: SHK (soohyun@ynu.ac.kr), JR (jhryu@ynu.ac.kr)

Tel.: +82-53-810-2474; Fax: +82-53-810-3987

#Author Contributions: A. Thakre and A. Kumar contributed equally to this work.

**Sc1: Calculations of the dielectric parameters  $\Delta T_m$ ,  $T_{cw}$ , and  $\gamma$  with equations.**

**Sc2: Calculations of the electric field distribution across each capacitor.**

**Supplementary figures:**

**Fig. S1:** Atomic force microscopy images ( $5\ \mu\text{m} \times 5\ \mu\text{m}$ ) of the (a) bare 65PMN-35PT/Pt/Si thick films and with an  $\text{Al}_2\text{O}_3$  dielectric layer thickness of (b) 20 nm (c) 50 nm and (d) 100 nm.

**Fig. S2:** Frequency-dependent impedance spectra for Pt/ $\text{Al}_2\text{O}_3$ /65PMN-35PT/Pt/Si heterostructure with varying the thickness of the dielectric  $\text{Al}_2\text{O}_3$  layer.

**Fig. S3:** Temperature-dependent dielectric response of the (a) bare 65PMN-35PT/Pt/Si thick films and with an  $\text{Al}_2\text{O}_3$  dielectric layer thickness of (b) 20 nm (c) 50 nm and (d) 100 nm, measured at different frequencies. Arrow direction in the figures (a) and (d) shows the frequency-dependent (RFE) and frequency-independent (FE) dielectric maxima temperature.

**Fig. S4:** Reciprocal of the dielectric constant w.r.t. temperature for the (a) bare 65PMN-35PT/Pt/Si thick films and with an  $\text{Al}_2\text{O}_3$  dielectric layer thickness of (b) 20 nm (c) 50 nm and (d) 100 nm.

**Fig. S5:**  $\text{Al}_2\text{O}_3$  thickness-dependent remnant polarisation and the coercive electric field of AD thick films of 65PMN-35PT material measured at 900 kV/cm.

### Sc1: Calculations of the dielectric parameters $\Delta T_m$ , $T_{cw}$ , and $\gamma$ with equations

The degree of deviation from the Curie-Weiss law ( $\Delta T_m$ ) can be calculated from the Eq. 1,

$$\Delta T_m = T_{cw} - T_m \quad (1)$$

where  $T_{cw}$  denotes the temperature in the reciprocal of dielectric constant vs. temperature graphs (Fig. S4) from which permittivity starts to deviate from the Curie-Weiss law and  $T_m$  is the dielectric maxima temperature.

The degree of diffuseness ( $\gamma$ ) in the dielectric peak can be calculated by a modified empirical expression (Eq. 2)

$$\frac{1}{\varepsilon} - \frac{1}{\varepsilon_{max}} = \frac{(T - T_{\varepsilon max})^\gamma}{C_1} \quad (2)$$

where  $\varepsilon$  and  $\varepsilon_{max}$  are the dielectric constants at temperature  $T$  ( $T > T_m$ ) and  $T_m$ , respectively.  $C_1$  is a Curie like constant. The parameter  $\gamma$  was calculated from the linear curve fit,  $\ln(1/\varepsilon - 1/\varepsilon_{max})$  vs.  $\ln(T - T_m)$  where  $\gamma$  represents the slope of the curve (Fig 4(c)). For  $\gamma = 1$ , normal Curie-Weiss behavior (sharp peak in  $\varepsilon$  vs.  $T$  curve),  $\gamma = 2$  complete relaxor type phase transition (broad peak in  $\varepsilon$  vs.  $T$  curve).

## Sc2: Calculations of the electric field distribution across each capacitor.

The effective capacitance ( $C_{\text{eff}}$ ) of the heterostructure is the series combination of the capacitances from  $\text{Al}_2\text{O}_3$  layer and PMN-PT film. Since the current flowing through each individual capacitance is same, the amount of stored charge will be the same in each capacitor irrespective of the value of each capacitance. However, the electric field across each capacitor will be different according to their value of capacitance.

As the electric field across each capacitor can be expressed as;

$$E_{C_{\text{Al}_2\text{O}_3}} = E_S \cdot \frac{C_{\text{eff}}}{C_{\text{Al}_2\text{O}_3}} \quad (3)$$

$$E_{C_{\text{PMN-PT}}} = E_S \cdot \frac{C_{\text{eff}}}{C_{\text{PMN-PT}}} \quad (4)$$

where,  $E_{C_{\text{Al}_2\text{O}_3}}$  and  $E_{C_{\text{PMN-PT}}}$  are the electric fields across the capacitances *i.e.*  $C_{\text{Al}_2\text{O}_3}$  and  $C_{\text{PMN-PT}}$  due to  $\text{Al}_2\text{O}_3$  and PMN-PT layers respectively, and  $E_S$  (Electric field  $\approx 900$  kV/cm) is the voltage across the heterostructure.

The measured capacitance of the PMN-PT ( $C_{\text{PMN-PT}}$ ) was 67 pF and the measured effective capacitances of the heterostructures were 49 pF, 35 pF and 19 pF for the  $\text{Al}_2\text{O}_3$  layer thickness 20 nm, 50 nm, and 100 nm; respectively. The calculated capacitances of the  $\text{Al}_2\text{O}_3$  layer with varied thickness are 186 pF, 74 pF, and 26 pF for 20 nm, 50 nm and 100 nm; respectively. From the Eq. 3 and Eq. 4, the calculated electric field across  $\text{Al}_2\text{O}_3$  and PMN-PT layers in the heterostructure are as below.

| S.N. | $\text{Al}_2\text{O}_3$<br>thickness | $C_{\text{eff}}$<br>(pF) | $C_{\text{PMN-PT}}$<br>(pF) | $C_{\text{Al}_2\text{O}_3}$<br>(pF) | $E_{C_{\text{Al}_2\text{O}_3}}$<br>(kV/cm) | $E_{C_{\text{PMN-PT}}}$<br>(kV/cm) |
|------|--------------------------------------|--------------------------|-----------------------------|-------------------------------------|--------------------------------------------|------------------------------------|
| 1.   | 0                                    | 67                       | 67                          | -                                   | -                                          | 900                                |
| 2.   | 20                                   | 49                       | 67                          | 186                                 | 236                                        | 659                                |
| 3.   | 50                                   | 35                       | 67                          | 74                                  | 425                                        | 470                                |
| 4.   | 100                                  | 19                       | 67                          | 26                                  | 644                                        | 250                                |

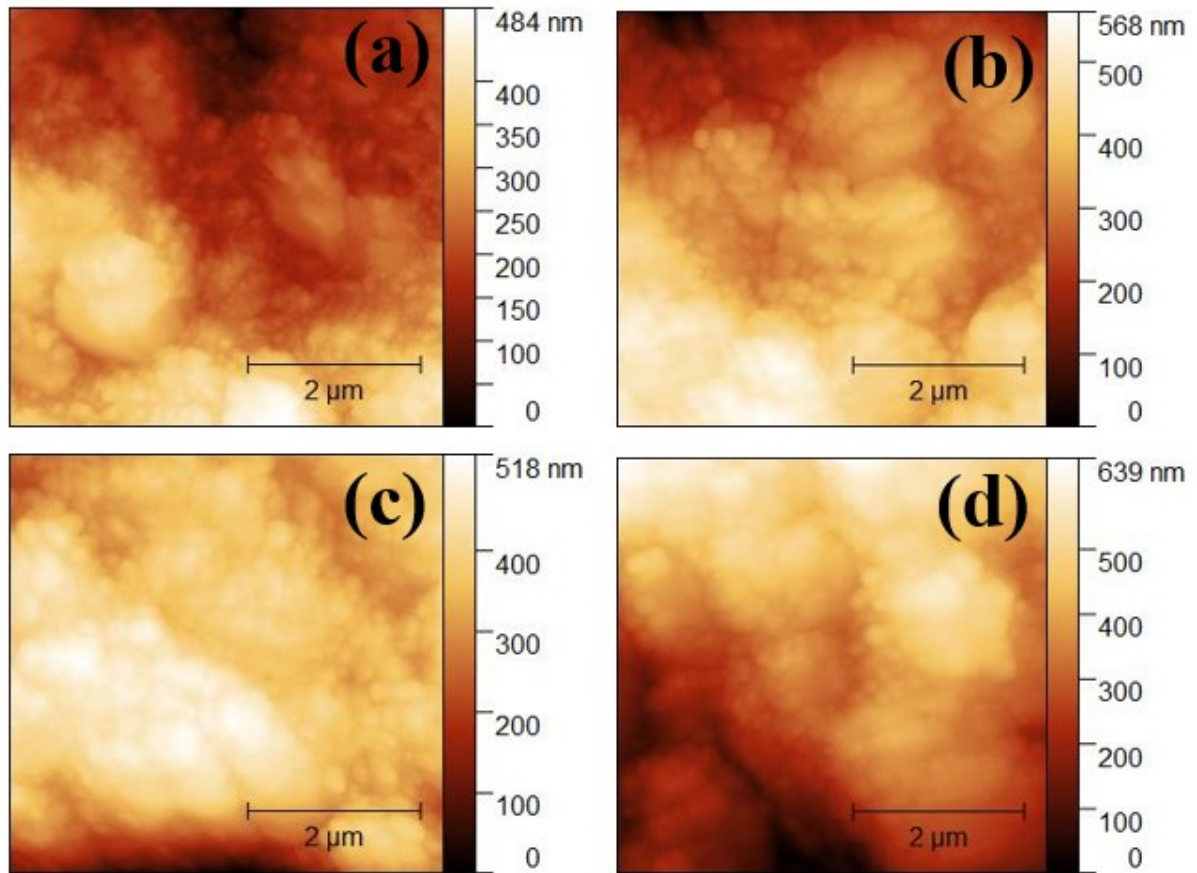

**Fig. S1:** Atomic force microscopy images ( $5\ \mu\text{m} \times 5\ \mu\text{m}$ ) of the (a) bare 65PMN-35PT/Pt/Si thick films and with an ALD Al<sub>2</sub>O<sub>3</sub> dielectric layer thickness of (b) 20 nm (c) 50 nm and (d) 100 nm.

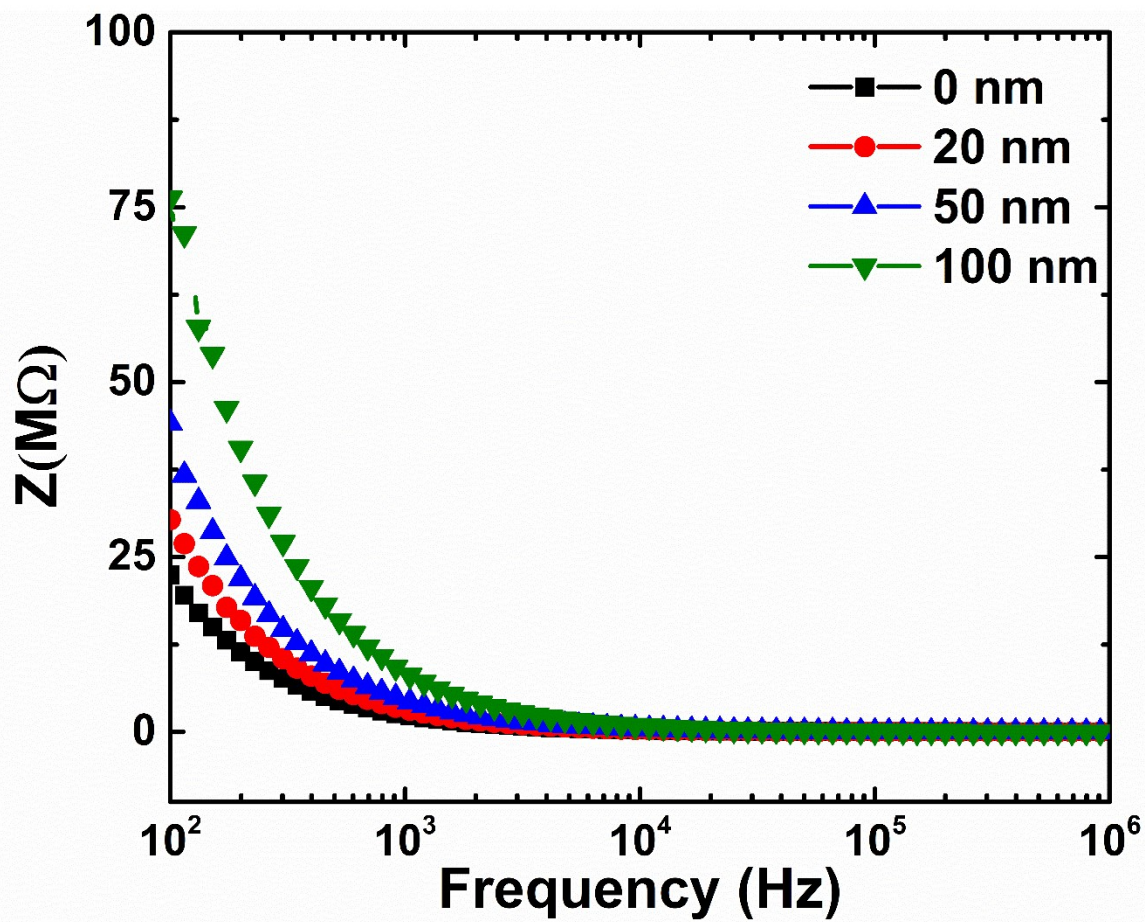

**Fig. S2:** Frequency-dependent impedance spectra for Pt/ $Al_2O_3$ /65PMN-35PT/Pt/Si heterostructure with varying the thickness of the dielectric  $Al_2O_3$  layer.

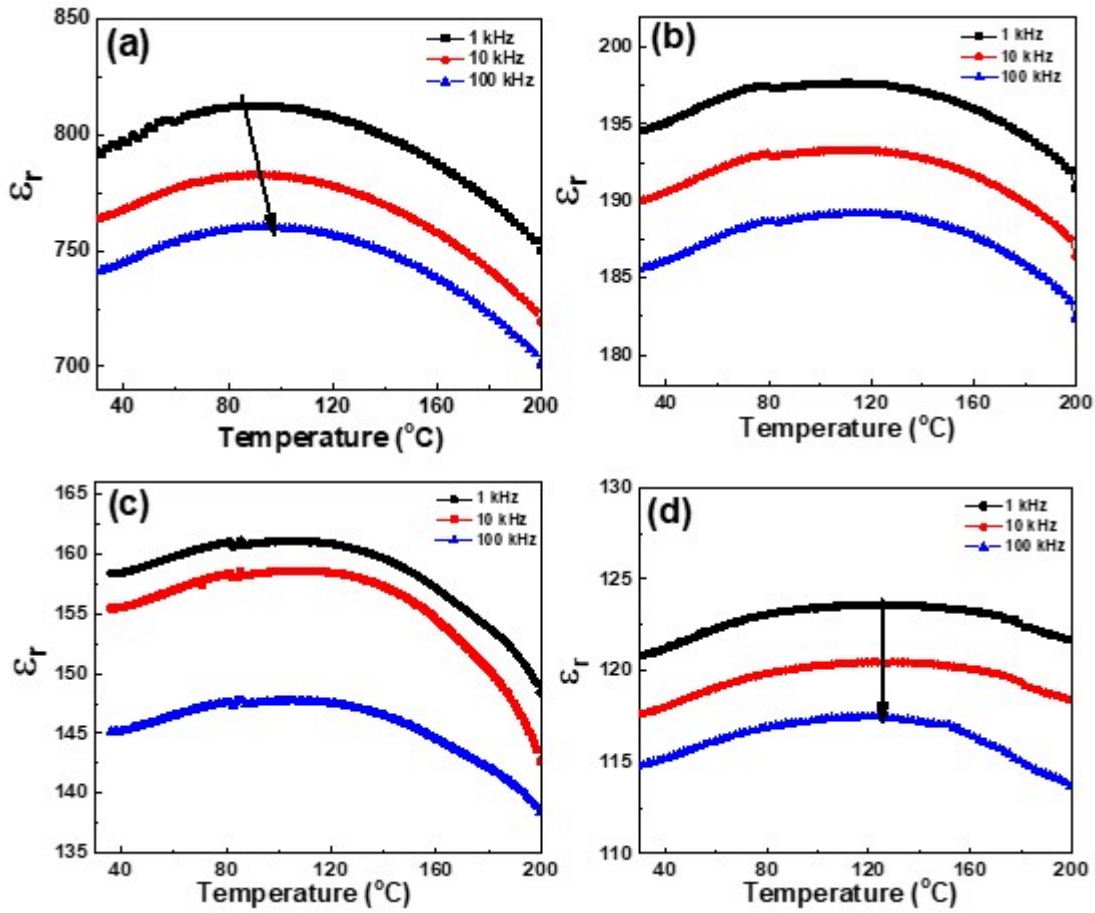

**Fig. S3:** Temperature-dependent dielectric response of the (a) bare 65PMN-35PT/Pt/Si thick films and with an  $\text{Al}_2\text{O}_3$  dielectric layer thickness of (b) 20 nm (c) 50 nm and (d) 100 nm, measured at different frequencies. Arrow direction in the figures (a) and (d) shows the frequency-dependent (RFE) and frequency-independent (FE) dielectric maxima temperature.

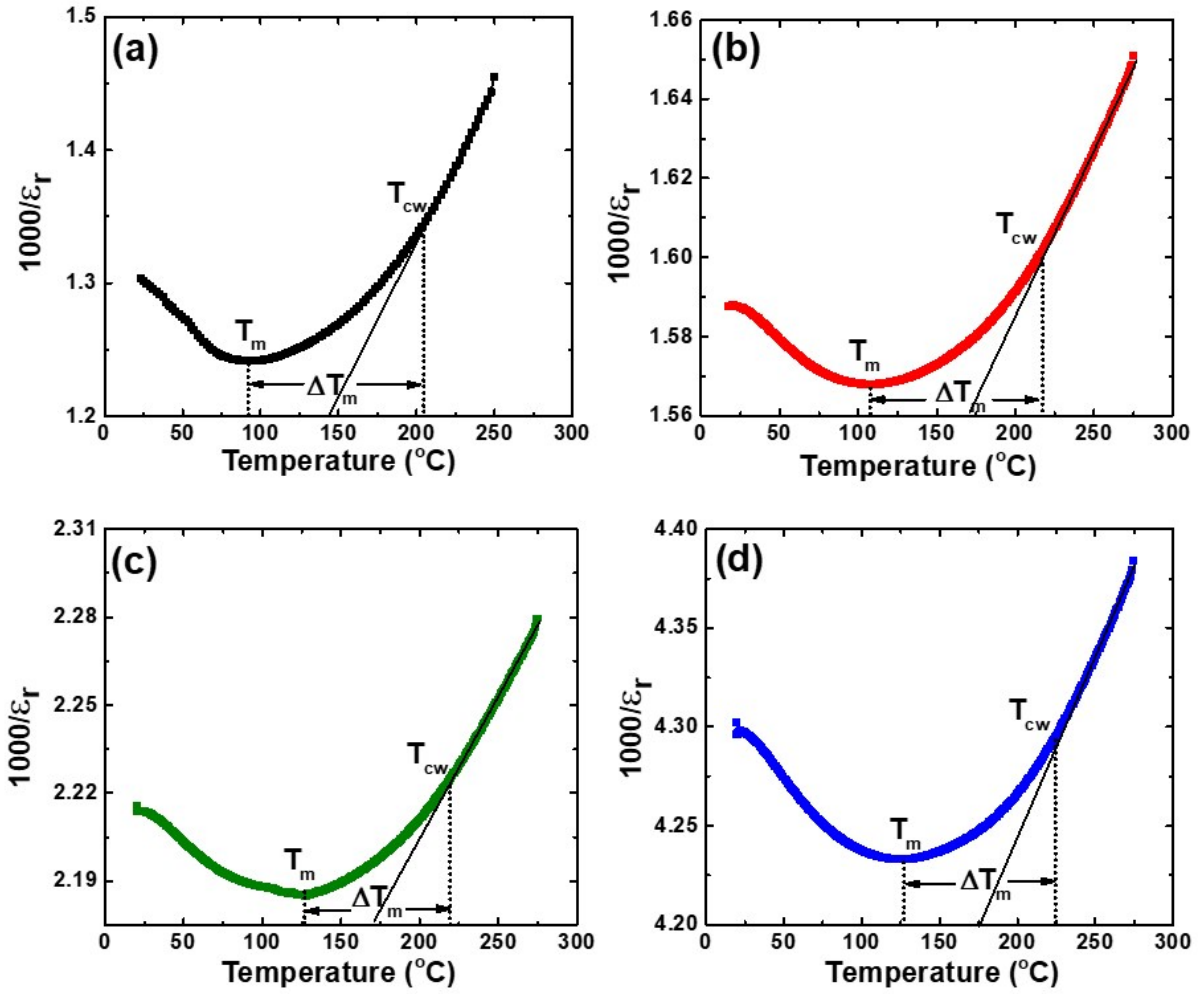

**Fig. S4:** Reciprocal of the dielectric constant w.r.t. temperature for the (a) bare 65PMN-35PT/Pt/Si thick films and with an Al<sub>2</sub>O<sub>3</sub> dielectric layer thickness of (b) 20 nm (c) 50 nm and (d) 100 nm.



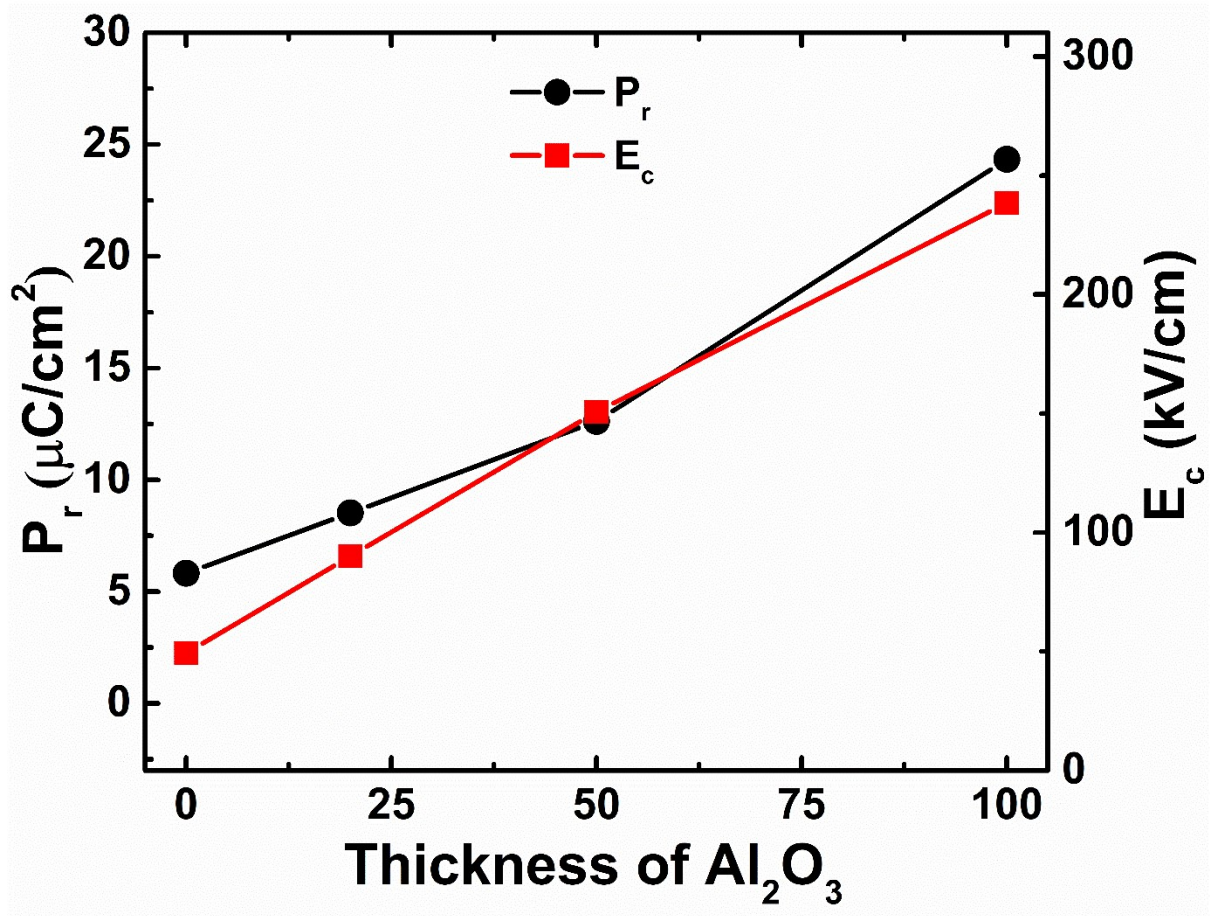

**Fig. S5:** Al<sub>2</sub>O<sub>3</sub> thickness-dependent remnant polarisation and the coercive electric field of AD thick films of 65PMN-35PT material measured at 900 kV/cm.
